# Supplementary material
Source: PubMed Central journal article supplement (PMC3888085)
Supplement: NIHMS529875-supplement-01.pdf [file NIHMS529875-supplement-01.pdf]

Supplemental TABLE 1

**Basal [<sup>35</sup>S]GTPγS binding in brain sections from vehicle- and THC- treated mice**

| Region              | Basal<br>[ <sup>35</sup> S]GTPγS binding |          |
|---------------------|------------------------------------------|----------|
|                     | VEH                                      | THC      |
| Prefrontal cortex   | 893 ± 32                                 | 850 ± 28 |
| Nucleus accumbens   | 1091 ± 39                                | 997 ± 32 |
| Caudate-putamen     | 1092 ± 24                                | 999 ± 39 |
| Lateral amygdala    | 1007 ± 37                                | 955 ± 34 |
| Basomedial amygdala | 1006 ± 28                                | 947 ± 21 |
| Hippocampus         | 687 ± 42                                 | 670 ± 41 |

Brain sections were incubated in 0.04 nM [<sup>35</sup>S]GTPγS and 2 mM GDP for autoradiography with results expressed as [<sup>35</sup>S]-GTPγS binding (nCi/g) ± SEM.
