# Supplementary material
Source: PubMed Central journal article supplement (PMC3888085)

# Supplemental Figure 1

A     $CB_1R$      $CB_1R$   
      WT        KO

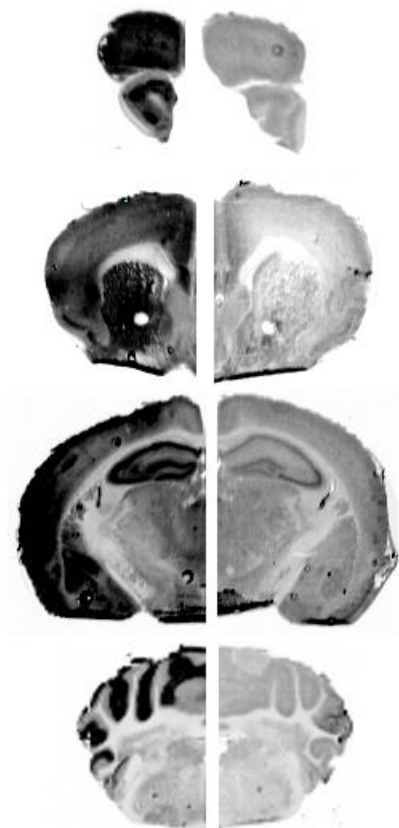

B     $CB_1R$      $CB_1R$   
      WT        KO

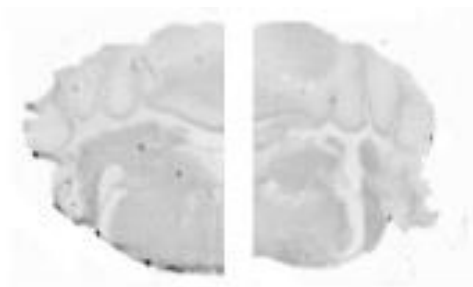

C     $CB_1R$      $CB_1R$   
      WT        KO

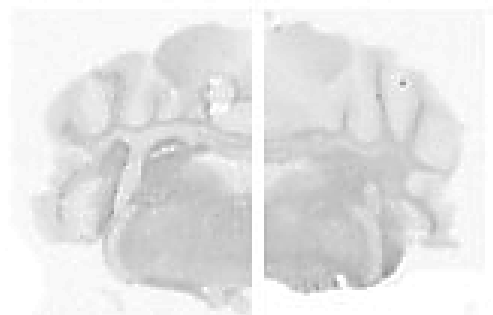

## Supplemental Figure 2

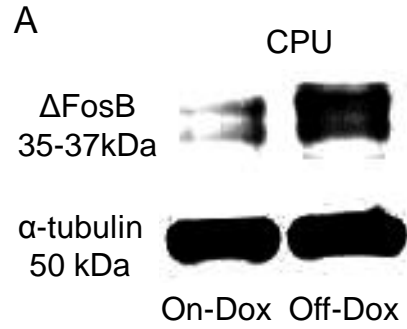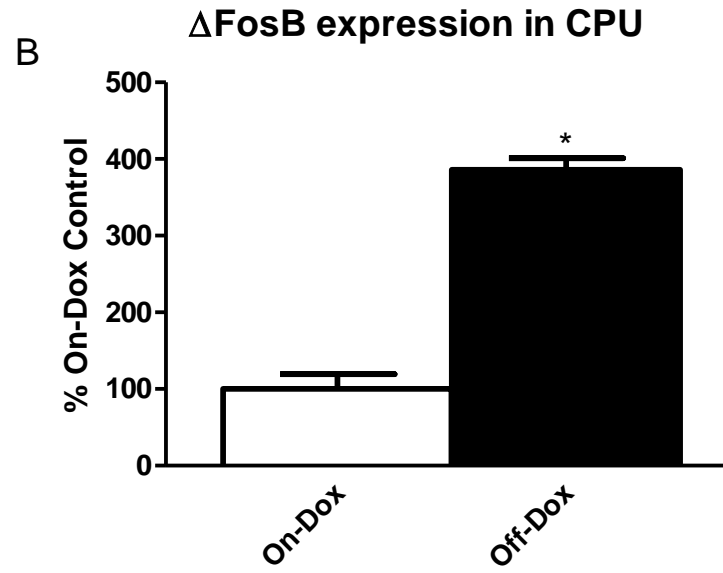

Supplemental Figure 3

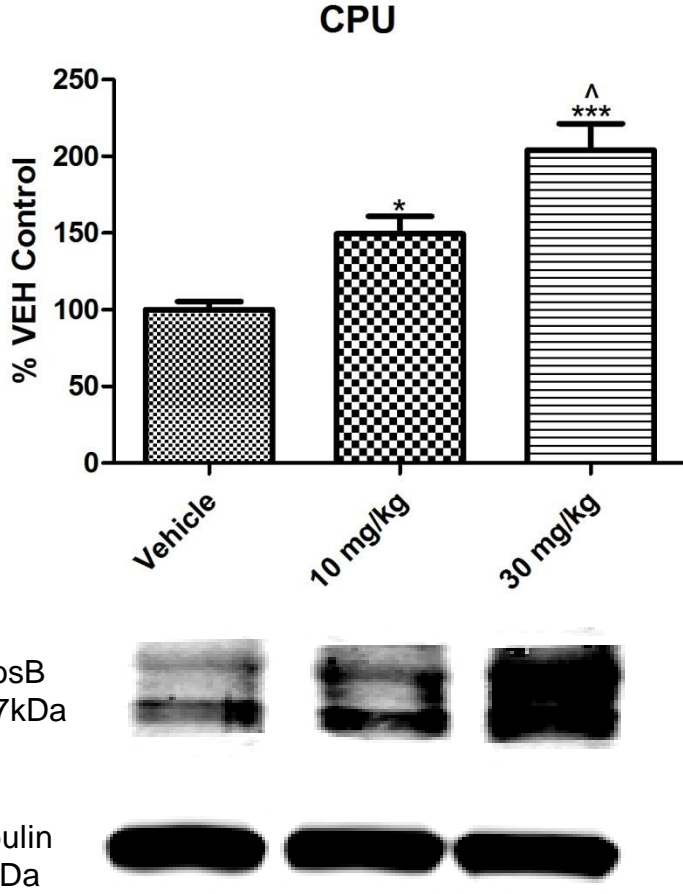

Supplement: NIHMS529875-supplement-02.pdf [file NIHMS529875-supplement-02.pdf]
